# Supplementary material for: Cisplatin induced neurotoxicity is mediated by Sarm1 and calpain activation
Source: PubMed Central journal article supplement (PMC7736304; doi:10.1038/s41598-020-78896-w), 2020-12-14
Supplement: 41598_2020_78896_MOESM1_ESM.pdf [file 41598_2020_78896_MOESM1_ESM.pdf]

## Supplementary Figures

### **Cisplatin induced neurotoxicity is mediated by Sarm1 and calpain activation**

Aysel Cetinkaya-Fisgin, PhD, Xinghua Luan MD, PhD, Nicole Reed, MS, Ye Eun Jeong, MS, Byoung Chol Oh PhD, and Ahmet Hoke, MD, PhD

Correspondence: [ahoke@jhmi.edu](mailto:ahoke@jhmi.edu)

### Chymotrypsin-like proteasome activity

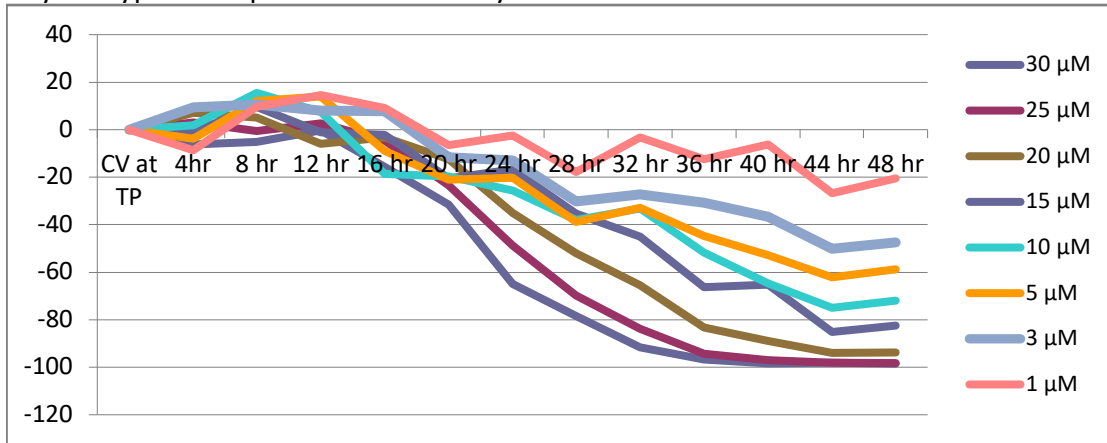

### Caspase activity

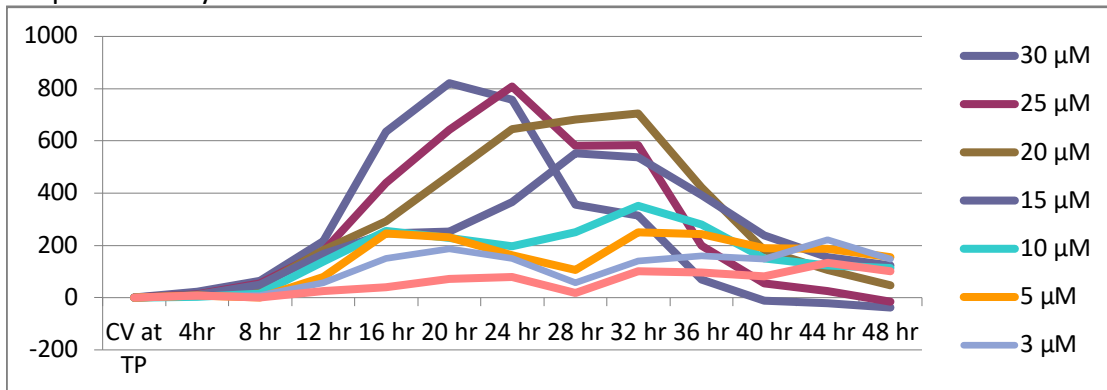

### Calpain activity

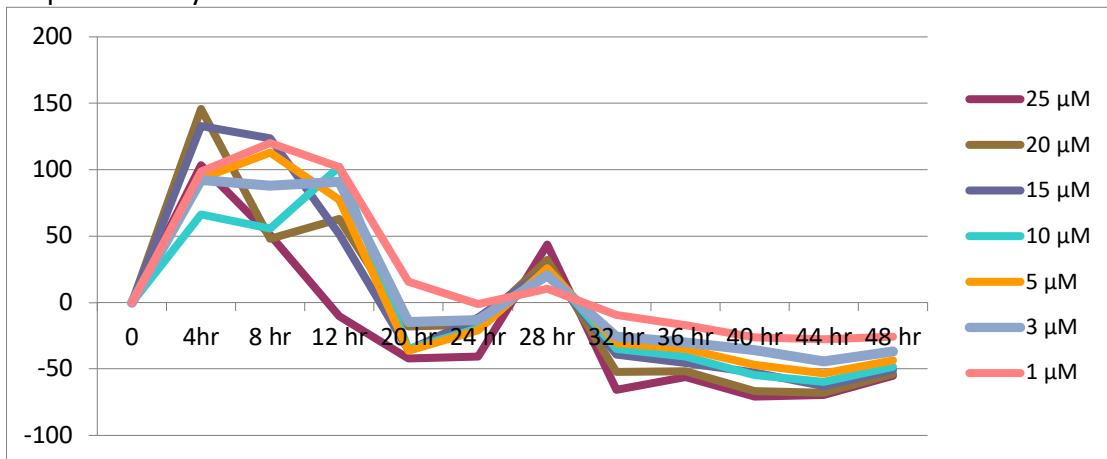

**Supplementary Figure 1:** CDDP inhibits the UPS and activates Caspase 3/7 and Calpains in a dose dependent manner. (n=4 at each time point)

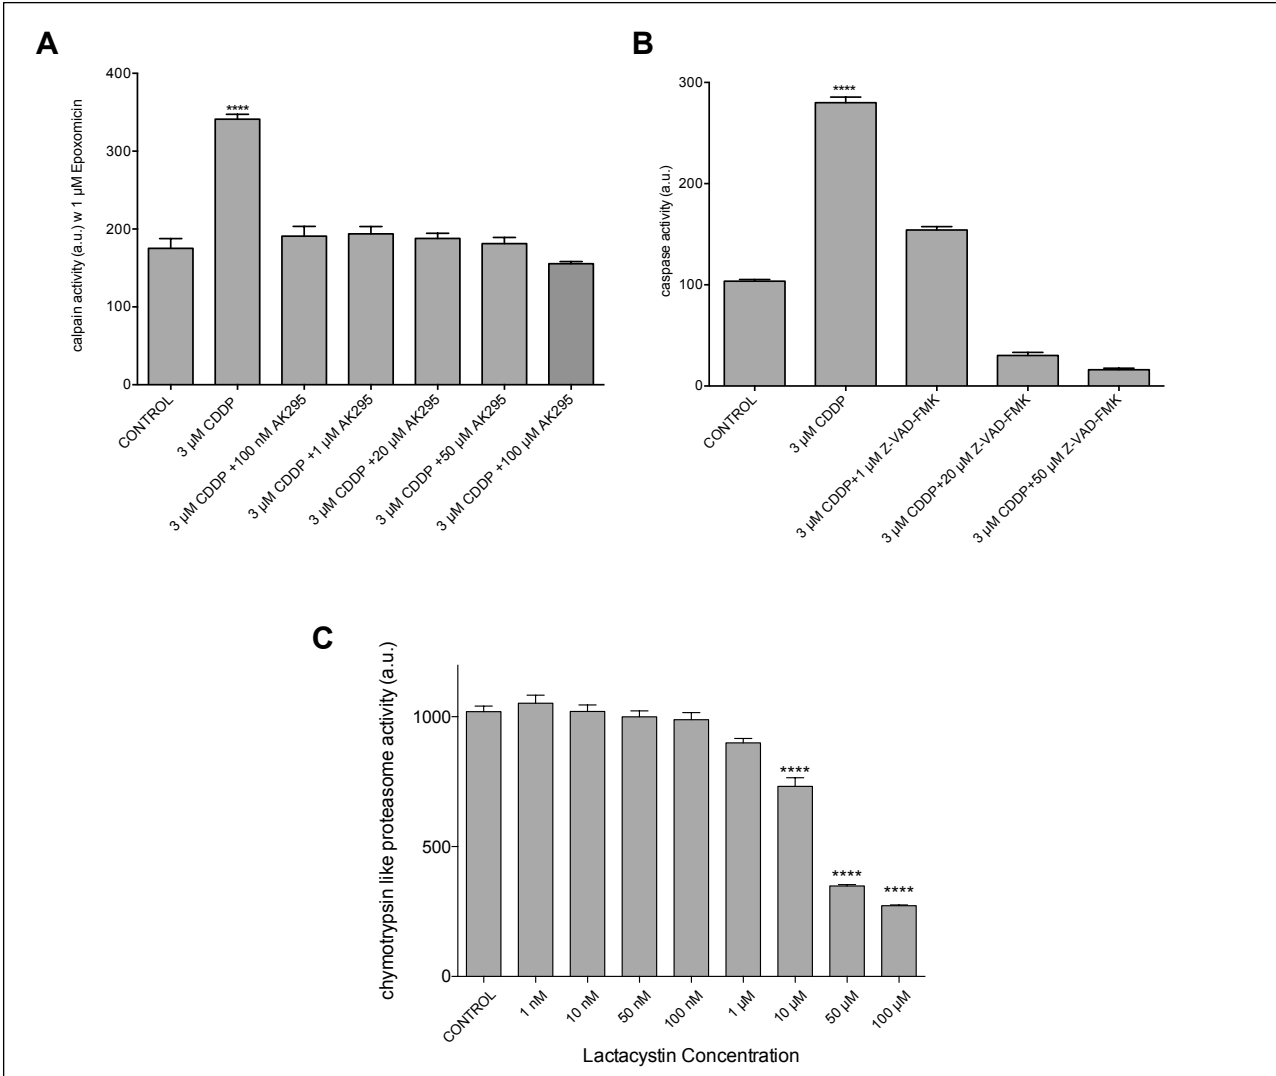

**Supplementary Figure 2:** The specificity of the Calpain-Glo and Caspase-Glo assays were evaluated with corresponding inhibitors (A and B) and inhibition of UPS by lactacystin was confirmed (C). Calpain activity was inhibited by AK295, a specific and highly potent inhibitor of calpain enzymatic activity (A). Similarly, caspase activity was inhibited by Z-VAD-fmk, a pan-caspase inhibitor (B). Lactacystin inhibited the UPS with a profile similar to that of CDDP.

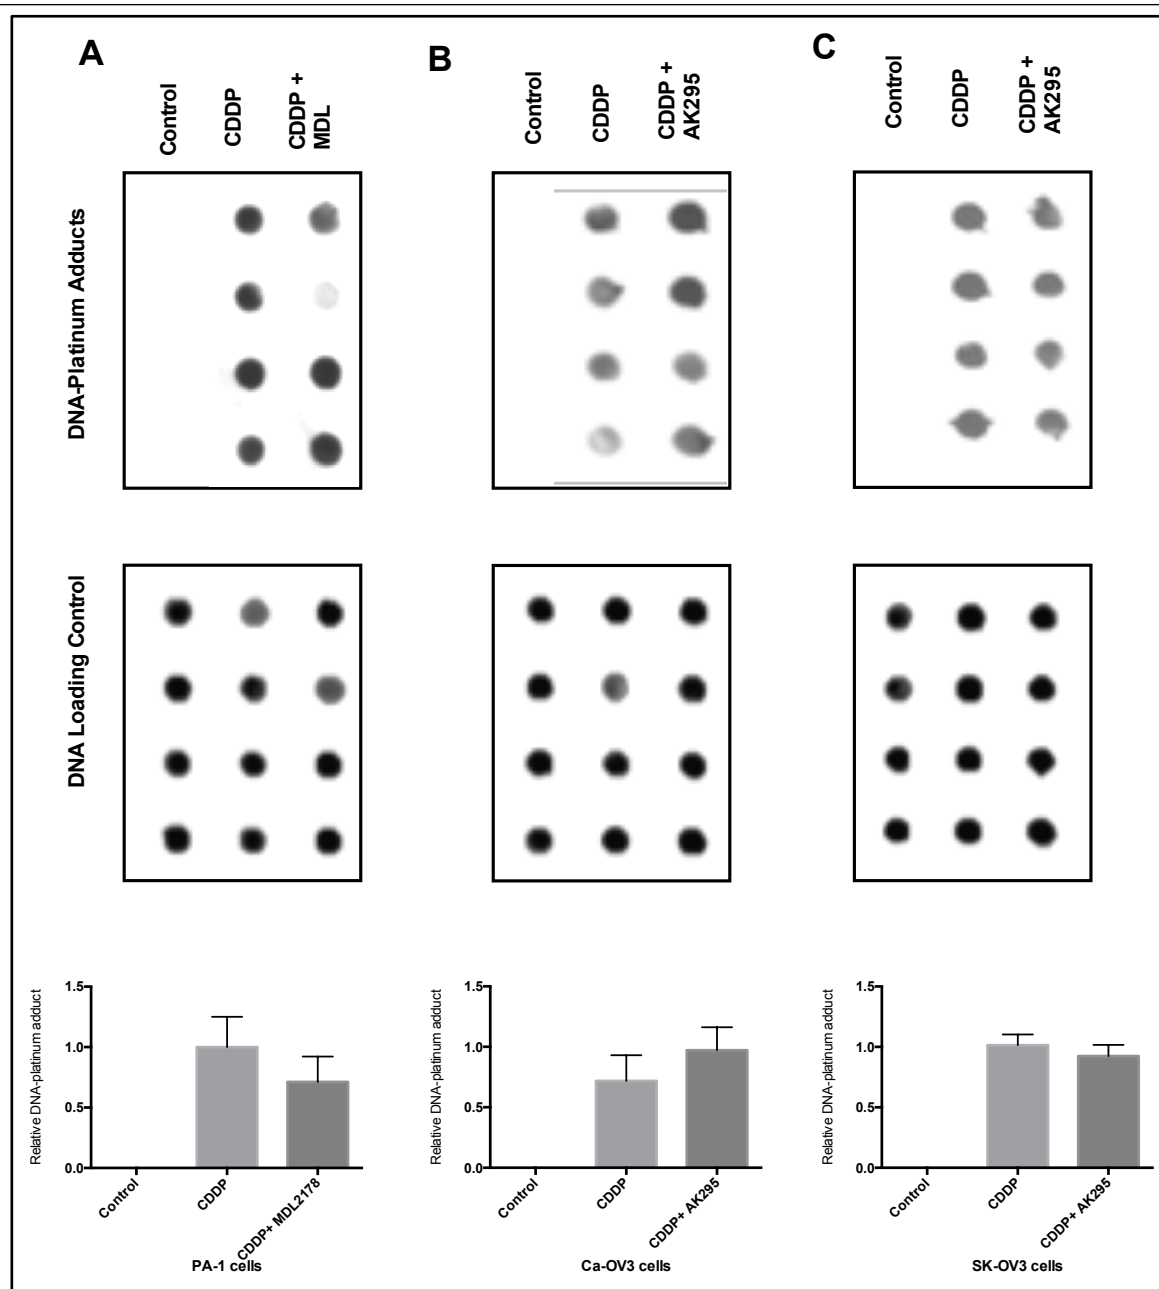

**Supplementary Figure 3:** Calpain inhibitors MDL2178 and AK295 do not affect DNA-Platinum adduct formation in three different cancer cell lines.
